# Supplementary material for: Mendelian randomisation of eosinophils and other cell types in relation to lung function and disease
Source: Thorax. 2022 May 10;78(5):496–503. doi: 10.1136/thoraxjnl-2021-217993 (PMC10176352; doi:10.1136/thoraxjnl-2021-217993)
Supplement: Supplementary data [file thoraxjnl-2021-217993supp003.xlsx]

## Sheet: ST1
Supplementary Table 1 ICD-10 codes to define acute exacerbations of COPD (AECOPD)
AECOPD cases had FEV1/FVC <0.7 and a relevant ICD-10 code in the Hospital Episode Statistics data.
Specifically, cases had either: an AECOPD or lower RTI ICD10 code (Section A) in the first position of any Finished Consultant Episode (FCE); or, an AECOPD or lower RTI ICD10 code in the second position of any FCE (Section A, below) AND one of the other codes (in Section B) in the first position of any FCE;
Controls had no AECOPD ICD10 code in any position of FCE.
Coding in HES	ICD-10 code
A. AECOPD ICD-10 codes to look up in position 1 or 2
J09	J09 Influenza due to certain identified influenza virus
J100	J10.0 Influenza with pneumonia, influenza virus identified
J101	J10.1 Influenza with other respiratory manifestations, influenza virus identified
J108	J10.8 Influenza with other manifestations, influenza virus identified
J110	J11.0 Influenza with pneumonia, virus not identified
J111	J11.1 Influenza with other respiratory manifestations, virus not identified
J118	J11.8 Influenza with other manifestations, virus not identified
J121	J12.1 Respiratory syncytial virus pneumonia
J122	J12.2 Parainfluenza virus pneumonia
J123	J12.3 Human metapneumovirus pneumonia
J128	J12.8 Other viral pneumonia
J129	J12.9 Viral pneumonia, unspecified
J13	J13 Pneumonia due to Streptococcus pneumoniae
J14	J14 Pneumonia due to Haemophilus influenzae
J151	J15.1 Pneumonia due to Pseudomonas
J154	J15.4 Pneumonia due to other streptococci
J157	J15.7 Pneumonia due to Mycoplasma pneumoniae
J158	J15.8 Other bacterial pneumonia
J159	J15.9 Bacterial pneumonia, unspecified
J180	J18.0 Bronchopneumonia, unspecified
J181	J18.1 Lobar pneumonia, unspecified
J188	J18.8 Other pneumonia, organism unspecified
J189	J18.9 Pneumonia, unspecified
J200	J20.0 Acute bronchitis due to Mycoplasma pneumoniae
J201	J20.1 Acute bronchitis due to Haemophilus influenzae
J202	J20.2 Acute bronchitis due to streptococcus
J205	J20.5 Acute bronchitis due to respiratory syncytial virus
J208	J20.8 Acute bronchitis due to other specified organisms
J209	J20.9 Acute bronchitis, unspecified
J22	J22 Unspecified acute lower respiratory infection
J440	J44.0 Chronic obstructive pulmonary disease with acute lower respiratory infection
J441	J44.1 Chronic obstructive pulmonary disease with acute exacerbation, unspecified
B. Acceptable ICD10 codes in primary position when AECOPD ICD10 code in secondary position
Coding in HES	ICD-10 code
I350	I35.0 Aortic (valve) stenosis
I48	I48 Atrial fibrillation and flutter
I500	I50.0 Congestive heart failure
I501	I50.1 Left ventricular failure
I509	I50.9 Heart failure, unspecified
I619	I61.9 Intracerebral haemorrhage, unspecified
I635	I63.5 Cerebral infarction due to unspecified occlusion or stenosis of cerebral arteries
I639	I63.9 Cerebral infarction, unspecified
I713	I71.3 Abdominal aortic aneurysm, ruptured
I714	I71.4 Abdominal aortic aneurysm, without mention of rupture
J069	J06.9 Acute upper respiratory infection, unspecified
J150	J15.0 Pneumonia due to Klebsiella pneumoniae
J152	J15.2 Pneumonia due to staphylococcus
J153	J15.3 Pneumonia due to streptococcus, group B
J155	J15.5 Pneumonia due to Escherichia coli
J156	J15.6 Pneumonia due to other aerobic Gram-negative bacteria
J160	J16.0 Chlamydial pneumonia
J168	J16.8 Pneumonia due to other specified infectious organisms
J172	J17.2 Pneumonia in mycoses
J182	J18.2 Hypostatic pneumonia, unspecified
J210	J21.0 Acute bronchiolitis due to respiratory syncytial virus
J219	J21.9 Acute bronchiolitis, unspecified
J40	J40 Bronchitis, not specified as acute or chronic
J41	J41 Simple and mucopurulent chronic bronchitis
J410	J41.0 Simple chronic bronchitis
J411	J41.1 Mucopurulent chronic bronchitis
J418	J41.8 Mixed simple and mucopurulent chronic bronchitis
J42	J42 Unspecified chronic bronchitis
J43	J43 Emphysema
J430	J43.0 MacLeod’s syndrome
J431	J43.1 Panlobular emphysema
J432	J43.2 Centrilobular emphysema
J438	J43.8 Other emphysema
J439	J43.9 Emphysema, unspecified
J44	J44 Other chronic obstructive pulmonary disease
J448	J44.8 Other specified chronic obstructive pulmonary disease
J449	J44.9 Chronic obstructive pulmonary disease, unspecified
J45	J45 Asthma
J450	J45.0 Predominantly allergic asthma
J451	J45.1 Nonallergic asthma
J458	J45.8 Mixed asthma
J459	J45.9 Asthma, unspecified
J46	J46 Status asthmaticus
J47	J47 Bronchiectasis
J690	J69.0 Pneumonitis due to food and vomit
J851	J85.1 Abscess of lung with pneumonia
J869	J86.9 Pyothorax without fistula
J90	J90 Pleural effusion, not elsewhere classified
J939	J93.9 Pneumothorax, unspecified
J960	J96.0 Acute respiratory failure
J961	J96.1 Chronic respiratory failure
J969	J96.9 Respiratory failure, unspecified
J980	J98.0 Diseases of bronchus, not elsewhere classified
J984	J98.4 Other disorders of lung
K439	K43.9 Ventral hernia without obstruction or gangrene
K573	K57.3 Diverticular disease of large intestine without perforation or abscess
K804	K80.4 Calculus of bile duct with cholecystitis
K85	K85 Acute pancreatitis
L031	L03.1 Cellulitis of other parts of limb
L039	L03.9 Cellulitis, unspecified
M169	M16.9 Coxarthrosis, unspecified
M313	M31.3 Wegener’s granulomatosis
N179	N17.9 Acute renal failure, unspecified
N390	N39.0 Urinary tract infection, site not specified
R002	R00.2 Palpitations
R042	R04.2 Haemoptysis
R05	R05 Cough
R060	R06.0 Dyspnoea
R068	R06.8 Other and unspecified abnormalities of breathing
R073	R07.3 Other chest pain
R074	R07.4 Chest pain, unspecified
R091	R09.1 Pleurisy
R296	R29.6 Tendency to fall, not elsewhere classified
R410	R41.0 Disorientation, unspecified
R509	R50.9 Fever, unspecified
R55	R55 Syncope and collapse
R64	R64 Cachexia
R683	R68.3 Clubbing of fingers
R91	R91 Abnormal findings on diagnostic imaging of lung
S062	S06.2 Diffuse brain injury
S7200	S72.00 Fracture of neck of femur (closed)

## Sheet: ST2
Supplementary Table 2 ICD-10 codes to define respiratory infections (RI)
Respiratory infection cases had an admission recorded in the Hospital Episode Statistics data coded using at least one of the ICD-10 codes listed below.
Controls had none of the ICD-10 codes listed below, or no HES data, implying no hospital admissions at all.
Coding in HES	ICD-10 code
A37	A37 Whooping cough
A370	A37.0 Whooping cough due to Bordetella pertussis
A371	A37.1 Whooping cough due to Bordetella parapertussis
A378	A37.8 Whooping cough due to other Bordetella species
A379	A37.9 Whooping cough, unspecified
A38	A38 Scarlet fever
A481	A48.1 Legionnaires' disease
A482	A48.2 Nonpneumonic Legionnaires' disease [Pontiac fever]
B974	B97.4 Respiratory synctial virus as the cause of diseases classified to other chapters
H65	H65 Nonsuppurative otitis media
H650	H65.0 Acute serous otitis media
H651	H65.1 Other acute nonsuppurative otitis media
H659	H65.9 Nonsuppurative otitis media, unspecified
H66	H66 Suppurative and unspecified otitis media
H660	H66.0 Acute suppurative otitis media
H661	H66.1 Chronic tubotympanic suppurative otitis media
H662	H66.2 Chronic atticoantral suppurative otitis media
H663	H66.3 Other chronic suppurative otitis media
H664	H66.4 Suppurative otitis media, unspecified
H669	H66.9 Otitis media, unspecified
H67	H67 Otitis media in diseases classified elsewhere
H670	H67.0 Otitis media in bacterial diseases classified elsewhere
H671	H67.1 Otitis media in viral diseases classified elsewhere
H678	H67.8 Otitis media in other diseases classified elsewhere
H92	H92 Otalgia and effusion of ear
H920	H92.0 Otalgia
H921	H92.1 Otorrhoea
J00	J00 Acute nasopharyngitis [common cold]
J01	J01 Acute sinusitis
J010	J01.0 Acute maxillary sinusitis
J011	J01.1 Acute frontal sinusitis
J012	J01.2 Acute ethmoidal sinusitis
J013	J01.3 Acute sphenoidal sinusitis
J014	J01.4 Acute pansinusitis
J018	J01.8 Other acute sinusitis
J019	J01.9 Acute sinusitis, unspecified
J02	J02 Acute pharyngitis
J020	J02.0 Streptococcal pharyngitis
J028	J02.8 Acute pharyngitis due to other specified organisms
J029	J02.9 Acute pharyngitis, unspecified
J03	J03 Acute tonsillitis
J030	J03.0 Streptococcal tonsillitis
J038	J03.8 Acute tonsillitis due to other specified organisms
J039	J03.9 Acute tonsillitis, unspecified
J04	J04 Acute laryngitis and tracheitis
J040	J04.0 Acute laryngitis
J041	J04.1 Acute tracheitis
J042	J04.2 Acute laryngotracheitis
J051	J05.1 Acute epiglottitis
J06	J06 Acute upper respiratory infections of multiple and unspecified sites
J060	J06.0 Acute laryngopharyngitis
J068	J06.8 Other acute upper respiratory infections of multiple sites
J069	J06.9 Acute upper respiratory infection, unspecified
J09	J09 Influenza due to certain identified influenza virus
J10	J10 Influenza due to identified influenza virus
J100	J10.0 Influenza with pneumonia, influenza virus identified
J101	J10.1 Influenza with other respiratory manifestations, influenza virus identified
J108	J10.8 Influenza with other manifestations, influenza virus identified
J11	J11 Influenza, virus not identified
J110	J11.0 Influenza with pneumonia, virus not identified
J111	J11.1 Influenza with other respiratory manifestations, virus not identified
J118	J11.8 Influenza with other manifestations, virus not identified
J12	J12 Viral pneumonia, not elsewhere classified
J120	J12.0 Adenoviral pneumonia
J121	J12.1 Respiratory syncytial virus pneumonia
J122	J12.2 Parainfluenza virus pneumonia
J123	J12.3 Human metapneumovirus pneumonia
J128	J12.8 Other viral pneumonia
J129	J12.9 Viral pneumonia, unspecified
J13	J13 Pneumonia due to Streptococcus pneumoniae
J14	J14 Pneumonia due to Haemophilus influenzae
J15	J15 Bacterial pneumonia, not elsewhere classified
J150	J15.0 Pneumonia due to Klebsiella pneumoniae
J151	J15.1 Pneumonia due to Pseudomonas
J152	J15.2 Pneumonia due to staphylococcus
J153	J15.3 Pneumonia due to streptococcus, group B
J154	J15.4 Pneumonia due to other streptococci
J155	J15.5 Pneumonia due to Escherichia coli
J156	J15.6 Pneumonia due to other aerobic Gram-negative bacteria
J157	J15.7 Pneumonia due to Mycoplasma pneumoniae
J158	J15.8 Other bacterial pneumonia
J159	J15.9 Bacterial pneumonia, unspecified
J16	J16 Pneumonia due to other infectious organisms, not elsewhere classified
J160	J16.0 Chlamydial pneumonia
J168	J16.8 Pneumonia due to other specified infectious organisms
J17	J17 Pneumonia in diseases classified elsewhere
J170	J17.0 Pneumonia in bacterial diseases classified elsewhere
J171	J17.1 Pneumonia in viral diseases classified elsewhere
J172	J17.2 Pneumonia in mycoses
J173	J17.3 Pneumonia in parasitic diseases
J178	J17.8 Pneumonia in other diseases classified elsewhere
J18	J18 Pneumonia, organism unspecified
J180	J18.0 Bronchopneumonia, unspecified
J181	J18.1 Lobar pneumonia, unspecified
J182	J18.2 Hypostatic pneumonia, unspecified
J188	J18.8 Other pneumonia, organism unspecified
J189	J18.9 Pneumonia, unspecified
J20	J20 Acute bronchitis
J200	J20.0 Acute bronchitis due to Mycoplasma pneumoniae
J201	J20.1 Acute bronchitis due to Haemophilus influenzae
J202	J20.2 Acute bronchitis due to streptococcus
J203	J20.3 Acute bronchitis due to coxsackie virus
J204	J20.4 Acute bronchitis due to parainfluenza virus
J205	J20.5 Acute bronchitis due to respiratory syncytial virus
J206	J20.6 Acute bronchitis due to rhinovirus
J207	J20.7 Acute bronchitis due to echovirus
J208	J20.8 Acute bronchitis due to other specified organisms
J209	J20.9 Acute bronchitis, unspecified
J21	J21 Acute bronchiolitis
J210	J21.0 Acute bronchiolitis due to respiratory syncytial virus
J211	J21.1 Acute bronchiolitis due to human metapneumovirus
J218	J21.8 Acute bronchiolitis due to other specified organisms
J219	J21.9 Acute bronchiolitis, unspecified
J22	J22 Unspecified acute lower respiratory infection

## Sheet: ST3
Supplementary Table 3 Selection of SNP instrumental variables for multivariable MR analyses of cell types and lung function
Stage	Basophils	Eosinophils	Neutrophils	Lymphocytes	Monocytes	Platelets	Red blood cells	Reticulocytes	Total	Unique
1) p<8.31x10-9 in Supplementary Table 4 of Astle et al.	80	209	152	188	248	287	212	210	1586	1499
2) Extract those available in outcome GWASs	68	167	114	155	190	221	163	165	1243	1166
3) LD clump across all cell types simultaneously	21	43	37	35	57	82	46	43	364	330
4) Extract unique SNPs from 8 cell type GWAS	329 SNPs
5) Harmonise with outcome GWASs so effects given in terms of same allele	318 SNPs*
6) Clumped SNPs p<8.31x10-9	27	57	55	44	74	96	54	56
7) Estimated variance explained in cell type count by SNPs in 6)**	0.015	0.043	0.038	0.033	0.084	0.094	0.054	0.074
8) Sample size for cell type GWAS***	171846	172275	170702	171643	170721	166066	172952	170641
9) Estimated conditional F statistic for 318 SNPs in 5)****	8	14	19	17	33	43	30	39
*Only 317 SNPs were available for the asthma MVMR analyses (missing rs2070433), and the FEV1FVC analyses stratified by asthma status (missing rs78265569)
**Variance explained (r2) estimated as=sum(2*EAF.exposure*(1-EAF.exposure)*(beta.exposure**2/1)) using the joint meta-analyses of UK Biobank and INTERVAL, where beta.exposure is SNP-exposure effect, and EAF is effect allele frequency.
***Taken from Astle et al., 2016
****Conditional F statistics estimated asusing the strength_mvmr() function from the R package 'MVMR' (https://github.com/WSpiller/MVMR). Phenotypic covariance was used as an estimate of genetic covariance.
NB that variance explained (and therefore F statistics) are likely to be upwardly biased by 'Winner's curse', since effect sizes are derived from the GWAS in which the SNP associations were discovered. However, the relative comparison between traits may be useful.

## Sheet: ST4
Supplementary Table 4 Full results for univariable MR analyses
outcome	type	method	samplesize.outcome	ncase.outcome	ncontrol.outcome	b*	se*	pval	Q	Q_df	Q_pval	egger_intercept	intercept_se	intercept_P
FEV1	Continuous	IVW	400102	NA	NA	-0.0284762	0.0127706	0.0257592	780.294	150	7.64938e-86	NA	NA	NA
FEV1	Continuous	MR Egger	400102	NA	NA	0.00906821	0.0306795	0.767963	770.932	149	1.48437e-84	-0.00169543	0.0012604	0.18062
FEV1	Continuous	Weighted median	400102	NA	NA	-0.0168485	0.0113079	0.136229	NA	NA	NA	NA	NA	NA
FVC	Continuous	IVW	400102	NA	NA	-0.00492037	0.0123789	0.691012	723.041	150	7.49769e-76	NA	NA	NA
FVC	Continuous	MR Egger	400102	NA	NA	0.0194098	0.0299007	0.517247	719.184	149	1.57765e-75	-0.00109594	0.00122585	0.372751
FVC	Continuous	Weighted median	400102	NA	NA	-0.0127097	0.0108089	0.239653	NA	NA	NA	NA	NA	NA
FEV1/FVC	Continuous	IVW	400102	NA	NA	-0.0494099	0.0151528	0.0011111	1055.13	150	7.5275e-136	NA	NA	NA
FEV1/FVC	Continuous	MR Egger	400102	NA	NA	-0.010445	0.0364609	0.774915	1045.44	149	1.81561e-134	-0.00175664	0.00149547	0.242013
FEV1/FVC	Continuous	Weighted median	400102	NA	NA	-0.0535172	0.0125562	2.02415e-05	NA	NA	NA	NA	NA	NA
Asthma	Binary	IVW	30810	5135	25675	0.899217	0.111048	5.60919e-16	662.434	149	8.06817e-66	NA	NA	NA
Asthma	Binary	MR Egger	30810	5135	25675	0.452364	0.266405	0.0916038	647.584	148	1.22579e-63	0.0202212	0.0109764	0.0674407
Asthma	Binary	Weighted median	30810	5135	25675	0.406094	0.102454	7.38042e-05	NA	NA	NA	NA	NA	NA
AECOPD	Binary	IVW	44823	2771	42052	0.0317747	0.067265	0.636655	142.839	150	0.648604	NA	NA	NA
AECOPD	Binary	MR Egger	44823	2771	42052	-0.150232	0.161942	0.355069	141.312	149	0.660719	0.00821867	0.00665196	0.21858
AECOPD	Binary	Weighted median	44823	2771	42052	0.100262	0.108176	0.354008	NA	NA	NA	NA	NA	NA
ACO	Binary	IVW	48428	8068	40360	0.619645	0.101337	9.67457e-10	777.478	150	2.39553e-85	NA	NA	NA
ACO	Binary	MR Egger	48428	8068	40360	0.316924	0.243706	0.195459	767.875	149	5.11605e-84	0.01365	0.00999987	0.174305
ACO	Binary	Weighted median	48428	8068	40360	0.364119	0.09703	0.000174982	NA	NA	NA	NA	NA	NA
Resp. Ix	Binary	IVW	120897	19459	101438	0.0181354	0.0288191	0.529162	176.334	150	0.0697657	NA	NA	NA
Resp. Ix	Binary	MR Egger	120897	19459	101438	-0.102193	0.0688526	0.139859	172.074	149	0.0948564	0.0054307	0.00282743	0.0566776
Resp. Ix	Binary	Weighted median	120897	19459	101438	-0.0325023	0.0442929	0.463068	NA	NA	NA	NA	NA	NA
*b and se=change in outcome (SD) per SD eosinophils (and corresponding standard error, SE) for continuous outcomes, and logOR / selogOR for binary outcomes.

## Sheet: ST5
Supplementary Table 5 MR-PRESSO results for four traits showing strongest evidence of causation by eosinophils in univariable MR
Exposure	MR Analysis	Causal Estimate	Sd	P-value	GlobalTestP	DistortionTestCoef(%)	DistortionTestP	Outliers
FEV1	Raw	-0.0284762	0.0127706	0.0272446	NA	NA	NA	NA
FEV1	Outlier-corrected	-0.0426075	0.00984876	2.91644e-05	<2e-04	33.1663	0.3244	1:150595537, 1:221051566, 12:112007756, 12:56449435, 14:93077611, 16:30592110, 22:31679449, 3:33047283, 4:103449131, 5:98166232, 6:29935250, 6:31337211, 6:33541507, 9:139356987
FEV1FVC	Raw	-0.0494099	0.0151528	0.00137524	NA	NA	NA	NA
FEV1FVC	Outlier-corrected	-0.0452488	0.0108634	5.60562e-05	<2e-04	-9.19606	0.6538	1:8504421, 10:9057422, 12:56449435, 15:67449660, 16:30103160, 16:30592110, 17:47398070, 17:65831258, 19:45742902, 19:46359794, 19:49458262, 2:102973899, 2:111900560, 2:61781994, 5:131804347, 5:98166232, 6:29935250, 6:32587213, 6:90956409
ACO	Raw	0.619645	0.101337	8.00452e-09	NA	NA	NA	NA
ACO	Outlier-corrected	0.471893	0.0832805	8.36043e-08	<2e-04	31.3105	0.0166	1:8504421, 10:9057422, 11:76293758, 12:112007756, 12:56449435, 15:67449660, 2:242698640, 2:8439629, 3:33047283, 5:110401872, 6:29935250, 6:32587213, 6:90956409, 9:6193455
Asthma	Raw	0.899217	0.111048	1.84611e-13	NA	NA	NA	NA
Asthma	Outlier-corrected	0.622544	0.0905331	2.03205e-10	<2e-04	44.4423	<2e-04	1:8504421, 10:8115362, 10:9057422, 11:76293758, 12:112007756, 12:57489709, 15:67449660, 16:11210447, 17:47398070, 2:102973899, 2:242698640, 5:110401872, 9:6193455
Causal estimates are beta coefficients for FEV1 and FEV1FVC, and log odds ratios for ACO and asthma
See also (https://www.nature.com/articles/s41588-018-0099-7).
‘GlobalTestP’: MR-PRESSO global test evaluates horizontal pleiotropy among all IVs by comparing the observed distance of all the variants to the regression line with the expected distance under the null hypothesis (no horizontal pleiotropy).
Outliers': MR-PRESSO can also conduct a ‘distortion test’ for differences in the causal estimates before and after outlier removal. The column 'Outliers' lists those IVs identified as outliers, by a test which evaluates the presence of specific horizontal pleiotropic outlier variants by using the observed and expected distributions of the tested variant.
‘DistortionTestCoef(%)’ and ‘DistortionTestP’: Outliers are excluded to calculate the 'Distortion Coefficient' (‘DistortionTestCoef(%)’, in percent) and its P-value (‘DistortionTestP’). This evaluates the degree of distortion between the causal estimate before and after outlier removal.

## Sheet: ST6
Supplementary Table 6 Sensitivity analyses for MR analyses of lung function, using outcome GWAS data from 79,055 SpiroMeta participants only (excluding UK Biobank)
Trait	method	b	lci	uci	pval
FEV1	Inverse variance weighted	-0.0431387	-0.0765059	-0.00977143	0.0112776
FEV1	MR Egger	-0.00350948	-0.083924	0.076905	0.931948
FEV1	Weighted median	-0.0270356	-0.0718989	0.0178277	0.237547
FVC	Inverse variance weighted	-0.0188724	-0.0533596	0.0156148	0.283464
FVC	MR Egger	-0.000748549	-0.0840955	0.0825984	0.985979
FVC	Weighted median	-0.0098362	-0.0542891	0.0346167	0.664511
FEV1FVC	Inverse variance weighted	-0.0409105	-0.0724165	-0.00940455	0.0109259
FEV1FVC	MR Egger	0.00331365	-0.0723237	0.078951	0.931687
FEV1FVC	Weighted median	-0.0666436	-0.110401	-0.0228865	0.00283442

## Sheet: ST7
Supplementary Table 7 Sensitivity analyses for MR analyses of FEV1/FVC, using outcome GWAS data from UKB only, and then UKB stratifed by asthma case status
Group	method	b	lci	uci	pval
UKB	Inverse variance weighted	-0.0511344	-0.0834024	-0.0188663	0.0018966
UKB	MR Egger	-0.0130547	-0.0908802	0.0647708	0.742786
UKB	Weighted median	-0.0553907	-0.0842564	-0.0265251	0.000169187
UKB (asthma)	Inverse variance weighted	-0.083	-0.139	-0.028	0.003
UKB (asthma)	MR Egger	-0.019	-0.153	0.115	0.782
UKB (asthma)	Weighted median	-0.066	-0.135	0.003	0.059
UKB (no asthma)	Inverse variance weighted	-0.012875	-0.0406039	0.0148538	0.362788
UKB (no asthma)	MR Egger	0.00946222	-0.0575383	0.0764627	0.782315
UKB (no asthma)	Weighted median	-0.0170029	-0.0418691	0.00786325	0.180179
N (UKB) = 321,047
N (UKB, no asthma) = 283,179
N (UKB, asthma) = 37,868

## Sheet: ST8
Supplementary Table 8 List of SNPs included in univariable MR analyses (effect allele frequencies from Astle et al. eosinophil GWAS)
SNP	rsid	other_allele.exposure	effect_allele.exposure	eaf.exposure
10:115348046	rs7080536	G	A	0.0441
10:26734517	rs11591540	G	A	0.4013
10:28780373	rs2998286	T	C	0.7695
10:64388631	rs10995240	G	C	0.3687
10:8115362	rs10905284	C	A	0.5749
10:8578342	rs1830951	C	A	0.4715
10:89726745	rs701848	T	C	0.3922
10:9057422	rs1031163	G	T	0.4227
10:993729	rs11253530	T	C	0.2145
11:108105928	rs228596	T	C	0.554
11:116590787	rs6589563	G	A	0.0786
11:116805064	rs77204473	T	G	0.0553
11:128216692	rs4937323	C	T	0.5641
11:61571382	rs174549	G	A	0.3091
11:65665256	rs634534	A	G	0.5409
11:76293758	rs7936323	G	A	0.4768
12:112007756	rs653178	C	T	0.5168
12:4318723	rs12820863	C	T	0.352
12:56449435	rs7302200	G	A	0.3411
12:57489709	rs1059513	T	C	0.1071
12:92519289	rs7135535	G	A	0.4495
12:980925	rs11613704	C	A	0.2008
13:40355913	rs9532434	T	C	0.6503
13:41195411	rs12583418	G	A	0.3068
13:99877471	rs7332672	C	T	0.6171
14:23589057	rs2239633	G	A	0.4844
14:25461989	rs2038700	T	C	0.3935
14:35882492	rs8020739	G	T	0.6429
14:75975648	rs175705	C	G	0.7192
14:93077611	rs72699818	T	C	0.1825
14:94417531	rs11555542	T	C	0.0638
15:67449660	rs2033784	A	G	0.2964
15:80194247	rs2115536	C	T	0.5663
16:11210447	rs12935413	G	A	0.3529
16:27349168	rs3785356	C	T	0.2972
16:2836027	rs7195287	T	G	0.7548
16:30103160	rs3809627	C	A	0.4018
16:30592110	rs74249949	A	G	0.1773
16:85810349	rs301161	G	A	0.8486
16:86017663	rs17445836	G	A	0.2311
16:88559851	rs74035506	A	G	0.1991
17:37955555	rs13313564	G	A	0.0346
17:41840849	rs77697917	C	T	0.0286
17:4522241	rs149206763	G	A	0.146
17:4535314	rs34210653	G	A	0.0214
17:47398070	rs9889262	T	A	0.366
17:65831258	rs7209675	A	T	0.1957
17:73801154	rs9900933	T	C	0.3439
17:7742601	rs74480102	G	A	0.043
18:60920854	rs17758695	C	T	0.03
18:61251973	rs12968338	C	T	0.7118
19:1079959	rs36084354	G	A	0.092
19:1104078	rs4807542	G	A	0.1694
19:16427111	rs410867	A	G	0.2164
19:3179517	rs61731111	C	T	0.0111
19:38899999	rs4802399	G	A	0.0437
19:40226275	rs395892	A	G	0.6705
19:45742902	rs145605569	C	T	0.259
19:46359794	rs76793172	C	T	0.0921
19:49458262	rs4645881	C	T	0.8535
1:101625883	rs1754541	A	G	0.3006
1:12099345	rs35249183	A	G	0.0997
1:150550924	rs34645101	T	C	0.0113
1:150595537	rs11204682	G	T	0.2247
1:199012478	rs1036332	A	C	0.7379
1:221051566	rs41369048	A	G	0.1224
1:23847464	rs2075995	C	A	0.5011
1:42371414	rs2147904	T	C	0.5644
1:65209111	rs114695117	C	A	0.0268
1:65423447	rs12408934	G	A	0.1012
1:8504421	rs159963	C	A	0.5826
1:87752000	rs6684992	A	T	0.1198
1:9355472	rs2072735	A	C	0.7539
1:93652785	rs7517363	C	T	0.6216
21:34433051	rs1000005	G	C	0.5894
21:36283811	rs28567906	A	G	0.0883
21:36398586	rs56117721	T	A	0.0726
21:36712588	rs8129030	T	A	0.631
21:45662979	rs9974367	C	G	0.3843
22:24621826	rs7288670	A	G	0.3075
22:31679449	rs4820961	C	T	0.5154
22:37258503	rs4821544	T	C	0.3079
22:41404939	rs743002	T	C	0.0656
2:102973899	rs11678360	A	G	0.3819
2:111900560	rs17484848	T	C	0.1031
2:112388532	rs4848100	C	T	0.768
2:213824045	rs12619285	A	G	0.265
2:213898232	rs1586068	A	G	0.9174
2:231122057	rs13023767	T	G	0.2524
2:234113057	rs7346	G	A	0.1909
2:242343404	rs3732276	C	T	0.1078
2:242698640	rs34290285	G	A	0.2571
2:61781994	rs778756	A	G	0.5793
2:8439629	rs10165200	G	A	0.3712
2:97201682	rs2579500	G	A	0.3889
3:10227980	rs114743735	C	G	0.0592
3:112066360	rs7612748	C	T	0.2894
3:112686075	rs1032726	T	C	0.467
3:12334991	rs2960422	G	A	0.602
3:128316435	rs4328821	A	G	0.1075
3:169487501	rs9811216	T	C	0.2616
3:3153339	rs1695315	G	A	0.6055
3:33047283	rs34064757	G	A	0.367
3:42906116	rs2228467	T	C	0.0616
3:51371323	rs73078622	A	G	0.0707
4:103449131	rs113473633	A	G	0.0281
4:38677062	rs68191221	A	G	0.215
4:83547862	rs17005891	G	A	0.185
5:10624866	rs10062687	T	G	0.2344
5:110401872	rs1837253	T	C	0.7393
5:131804347	rs2248116	C	A	0.5626
5:133619966	rs62381364	C	T	0.1129
5:141499041	rs1036207	A	G	0.6161
5:148200011	rs56330463	T	C	0.5511
5:35844125	rs1961220	G	A	0.34
5:98166232	rs331929	A	G	0.2777
6:107444153	rs6568466	T	C	0.5471
6:135424179	rs35959442	C	G	0.2707
6:209159	rs11242709	C	T	0.208
6:29935250	rs3893464	G	A	0.4883
6:31337211	rs9266428	G	A	0.1804
6:32587213	rs28383314	T	C	0.6172
6:33541507	rs511515	A	G	0.6998
6:42197707	rs61612642	C	T	0.1662
6:577820	rs9504361	A	G	0.4484
6:90956409	rs62408225	A	G	0.3515
7:112782556	rs12705849	G	A	0.4079
7:148869277	rs4727027	G	A	0.6312
7:20541865	rs10265538	T	C	0.2465
7:22777327	rs12700391	C	A	0.59
7:3171020	rs13223928	T	C	0.4988
7:37403647	rs77972791	A	G	0.105
7:50444152	rs150640087	G	T	0.0162
7:50807425	rs17548938	G	A	0.0861
7:75442730	rs2302006	T	G	0.1863
7:92236829	rs4272	A	G	0.2113
7:92408370	rs445	C	T	0.0972
8:119939859	rs7834745	A	G	0.1898
8:129004975	rs11786130	G	A	0.3453
8:145158607	rs34173062	G	A	0.0749
8:22957003	rs12545733	T	C	0.7011
8:48651633	rs45577137	A	G	0.0461
8:61636887	rs35914442	A	G	0.0898
9:113640132	rs547116	T	A	0.3817
9:117696336	rs726657	C	T	0.4071
9:135880469	rs605642	C	A	0.5804
9:139356987	rs57994353	T	C	0.2994
9:4793798	rs296847	G	T	0.662
9:5075628	rs10283564	C	G	0.2514
9:6193455	rs2381416	C	A	0.737
9:94096752	rs201272561	C	T	0.1578

## Sheet: ST9
Supplementary Table 9 List of SNPs included in multivariable MR analyses (effect allele frequencies from Astle et al. eosinophil GWAS)
SNP	chr.exposure	pos.exposure	other_allele.exposure	effect_allele.exposure	eaf.exposure	note
rs78265569	1	2146165	C	A	0.0895	missing FEV1FVC stratified by asthma status
rs1569419	1	2996602	T	C	0.7653
rs1175550	1	3691528	A	G	0.2321
rs111941366	1	25736369	C	T	0.4505
rs146091102	1	27121930	G	A	0.0344
rs1999537	1	56905524	G	A	0.8978
rs9436747	1	65911607	T	C	0.6284
rs41313381	1	79411968	C	A	0.0307
rs1537061	1	87739219	T	C	0.0983
rs141094656	1	92753336	T	C	0.0164
rs115340020	1	92766438	G	A	0.0287
rs1754541	1	101625883	A	G	0.3006
rs17608459	1	110435328	G	A	0.1197
rs2932536	1	113202417	G	A	0.527
rs11587735	1	118153011	A	C	0.1683
rs4970966	1	150584103	G	T	0.2251
rs2022003	1	158586966	A	T	0.2785
rs6425521	1	171942783	C	A	0.8025
rs10489481	1	185391167	G	A	0.3218
rs146310930	1	198581291	C	T	0.0291
rs11240408	1	205264536	A	T	0.626
rs792448	1	212558397	T	A	0.3441
rs2615061	1	225895806	G	A	0.1167
rs6429432	1	236107241	A	C	0.8919
rs41315846	1	247712303	T	C	0.4751
rs1339847	1	248039294	G	A	0.1094
rs3896594	2	8762414	T	G	0.3812
rs1260326	2	27730940	T	C	0.6053
rs655029	2	31477838	G	A	0.7098
rs11678584	2	32563426	A	T	0.1358
rs10168349	2	46360907	G	C	0.3308
rs10865309	2	58984870	C	T	0.1382
rs10048745	2	68962137	G	A	0.2598
rs2579500	2	97201682	G	A	0.3889
rs56088557	2	111736823	A	G	0.2063
rs150449635	2	111752151	T	C	0.024
rs17484848	2	111900560	T	C	0.1031
rs62160676	2	112167931	T	C	0.2975
rs13022141	2	136889208	A	G	0.7355
rs12052715	2	160677375	C	G	0.7246
rs113678689	2	161306828	G	C	0.199
rs6433895	2	182012014	A	C	0.3221
rs4853525	2	191737464	T	C	0.368
rs6735656	2	202124502	G	T	0.746
rs12619285	2	213824045	A	G	0.265
rs1870125	2	219187901	C	T	0.591
rs10168795	2	225753342	A	G	0.1563
rs9287604	2	237776165	G	C	0.7325
rs78909033	2	241510903	G	A	0.1349
rs163574	3	3096927	A	G	0.9086
rs114743735	3	10227980	C	G	0.0592
rs4502545	3	28303030	G	A	0.176
rs3732378	3	39307162	G	A	0.1736
rs3181077	3	46250652	C	T	0.717
rs1076872	3	50329826	A	G	0.6833
rs1354034	3	56849749	T	C	0.599
rs35592432	3	71355240	G	C	0.0279
rs9809116	3	72397279	A	G	0.4073
rs1032726	3	112686075	T	C	0.467
rs3804749	3	122833003	C	T	0.5935
rs4328821	3	128316435	A	G	0.1075
rs7650602	3	141147414	T	C	0.4494
rs2227930	3	142277575	A	T	0.5868
rs12491785	3	168846701	C	T	0.6069
rs9831543	3	178768011	A	G	0.694
rs6141	3	184090266	C	T	0.5322
rs35430985	3	185488303	C	A	0.27
rs13092376	3	196516288	A	C	0.4194
rs11734099	4	6891435	G	A	0.1751
rs11931598	4	7047102	C	T	0.4444
rs1386622	4	38372055	T	G	0.6804
rs218265	4	55408999	T	C	0.1571
rs6554196	4	55501109	C	G	0.3812
rs1352846	4	72617775	A	G	0.2919
rs11725704	4	74959996	A	G	0.3765
rs56390363	4	87943087	G	A	0.1908
rs4699154	4	106034084	T	C	0.6897
rs7692976	4	110911567	A	G	0.4043
rs1155577	4	120449810	C	T	0.4868
rs13101482	4	144910616	G	A	0.6882
rs10028187	4	154391440	A	G	0.3151
rs113128512	4	157682188	T	C	0.0917
rs35188965	5	1104938	C	T	0.5795
rs4449583	5	1284135	C	T	0.3259
rs62355272	5	35849941	C	A	0.2572
rs115421711	5	52083226	A	G	0.0412
rs114309882	5	52095943	G	A	0.0226
rs3111637	5	53655624	G	C	0.1544
rs2338224	5	71728688	A	G	0.8788
rs34592828	5	75996909	G	A	0.0449
rs114694170	5	88180196	T	C	0.0586
rs17462893	5	95163437	A	G	0.1018
rs1837253	5	110401872	T	C	0.7393
rs2248116	5	131804347	C	A	0.5626
rs79237520	5	134712566	C	T	0.0244
rs1036207	5	141499041	A	G	0.6161
rs960709	5	150461049	A	G	0.2382
rs74417235	5	154027216	A	G	0.0951
rs10075570	5	158599358	G	A	0.2511
rs791357	5	173205225	T	C	0.7203
rs875741	5	173287851	G	A	0.4062
rs9504361	6	577820	A	G	0.4484
rs75757892	6	7232389	C	T	0.1827
rs1144700	6	16744687	C	T	0.1788
rs113977268	6	22359515	G	A	0.0859
rs2022065	6	30121460	C	T	0.2961
rs2524079	6	31242174	G	A	0.4171
rs210142	6	33546837	T	C	0.7018
rs10947997	6	41921241	G	T	0.1771
rs833070	6	43742626	T	C	0.4996
rs833805	6	44030011	A	G	0.8865
rs171835	6	82464987	G	A	0.2363
rs62408225	6	90956409	A	G	0.3515
rs6568490	6	108053969	G	T	0.1622
rs9487023	6	109590004	A	G	0.4457
rs516805	6	122719631	G	T	0.7082
rs7776054	6	135418916	A	G	0.2603
rs592423	6	139840693	A	C	0.5539
rs149110519	6	144385777	C	T	0.0349
rs2451279	6	159515077	A	G	0.6179
rs4709819	6	164463355	G	A	0.4063
rs13223928	7	3171020	T	C	0.4988
rs6796	7	6502367	T	C	0.2776
rs696281	7	16731042	G	T	0.2149
rs2158799	7	28277107	C	G	0.6083
rs56388170	7	28724374	G	T	0.2957
rs77972791	7	37403647	A	G	0.105
rs834603	7	47447921	A	G	0.4909
rs4385425	7	50307334	A	G	0.3213
rs149007767	7	50370254	C	T	0.1619
rs62466318	7	73042085	C	T	0.2039
rs2302006	7	75442730	T	G	0.1863
rs8179	7	92236164	T	C	0.7915
rs445	7	92408370	C	T	0.0972
rs551238	7	100321528	G	T	0.5982
rs77300440	7	123411910	C	T	0.0805
rs7788849	7	129281919	C	A	0.9021
rs10954464	7	134384957	T	A	0.347
rs7785014	7	137881690	T	C	0.6718
rs10224210	7	151413194	T	C	0.2821
rs7826487	8	6880925	A	G	0.1175
rs378974	8	9026639	C	T	0.3013
rs58141407	8	21791772	C	T	0.1598
rs9644063	8	22974450	T	C	0.8212
rs2979489	8	30280833	G	A	0.7424
rs4737010	8	41630447	G	A	0.228
rs7846314	8	61650831	A	T	0.1865
rs11995702	8	66926423	A	G	0.3221
rs2919917	8	79657263	T	C	0.2501
rs6997458	8	86274030	T	G	0.5711
rs6993770	8	106581528	A	T	0.2862
rs13271228	8	116597409	T	G	0.5657
rs7834745	8	119939859	A	G	0.1898
rs2954031	8	126491733	G	T	0.4451
rs11786130	8	129004975	G	A	0.3453
rs1982094	8	130624816	C	T	0.0424
rs7833924	8	144996029	A	G	0.4277
rs12005199	9	4763491	G	A	0.3079
rs2381416	9	6193455	C	A	0.737
rs10811664	9	22142907	G	A	0.1566
rs7045087	9	32455262	T	C	0.298
rs62573167	9	79814194	C	T	0.2088
rs9410380	9	91453631	T	C	0.5097
rs56339712	9	92025757	C	T	0.284
rs201272561	9	94096752	C	T	0.1578
rs10984466	9	100707992	A	G	0.3631
rs10980797	9	113912553	A	G	0.4899
rs726657	9	117696336	C	T	0.4071
rs55793580	9	127009395	C	T	0.1577
rs60757417	9	135864436	C	G	0.0611
rs8176746	9	136131322	G	T	0.0634
rs57994353	9	139356987	T	C	0.2994
rs11253530	10	993729	T	C	0.2145
rs7090504	10	6091017	T	A	0.1995
rs1912580	10	9036982	G	C	0.1537
rs11014296	10	25202038	C	T	0.37
rs2992262	10	26741174	C	T	0.6075
rs475616	10	30496905	A	G	0.6559
rs2281841	10	45406608	T	C	0.5803
rs7908745	10	45953767	A	G	0.3143
rs10995240	10	64388631	G	C	0.3687
rs17476364	10	71094504	T	C	0.1103
rs142239370	10	72382869	A	C	0.0406
rs2068888	10	94839642	G	A	0.451
rs4919087	10	99072507	A	G	0.5966
rs7080536	10	115348046	G	A	0.0441
rs4450131	10	126383363	T	C	0.5249
rs11604127	11	196944	C	T	0.2344
rs907612	11	1874221	C	T	0.3819
rs734095	11	2323198	C	G	0.1138
rs55893317	11	10180991	A	G	0.2443
rs10766533	11	19224677	T	A	0.7203
rs6484504	11	31424823	T	C	0.725
rs7950696	11	47481533	T	C	0.445
rs174548	11	61571348	C	G	0.314
rs3741404	11	63999240	G	C	0.3599
rs634534	11	65665256	A	G	0.5409
rs7936323	11	76293758	G	A	0.4768
rs655641	11	85731286	C	G	0.8086
rs72996113	11	100453046	C	T	0.0974
rs7943203	11	108344081	G	A	0.4105
rs964184	11	116648917	G	C	0.8666
rs36109901	11	119083318	A	C	0.2722
rs4937127	11	126290510	A	G	0.5227
rs10849020	12	4332009	C	G	0.2089
rs10466905	12	6502832	G	A	0.1918
rs10844706	12	9910132	C	A	0.3716
rs2015599	12	29435480	G	A	0.4597
rs2732480	12	48736303	C	A	0.4274
rs2446066	12	53778650	G	T	0.1738
rs79977579	12	54694560	C	A	0.0981
rs1716505	12	65005079	C	G	0.3207
rs1800973	12	69744014	C	A	0.0618
rs6538148	12	88818479	C	G	0.7033
rs17041439	12	101873240	A	C	0.0557
rs4388979	12	109475012	G	T	0.5834
rs653178	12	112007756	C	T	0.5168
rs2255531	12	121414915	G	A	0.3495
rs11553699	12	122216910	A	G	0.1404
rs79478560	12	124399155	G	A	0.3686
rs1805106	13	28542961	C	G	0.0335
rs76428106	13	28604007	T	C	0.0146
rs1892548	13	41002641	T	C	0.6579
rs9535495	13	51388960	C	T	0.5569
rs73217470	13	72513420	A	G	0.0476
rs9573567	13	76057383	G	A	0.0992
rs4148435	13	95899716	C	A	0.9159
rs150861794	13	109003805	C	T	0.0201
rs11841319	13	110492626	C	T	0.103
rs2239630	14	23589349	A	G	0.5597
rs2038700	14	25461989	T	C	0.3935
rs696	14	35871093	C	T	0.3633
rs4470077	14	55897538	A	G	0.1907
rs1741464	14	65280076	C	A	0.2896
rs10220411	14	69452088	A	G	0.2612
rs175705	14	75975648	C	G	0.7192
rs72699818	14	93077611	T	C	0.1825
rs1555405	14	101176769	G	A	0.2483
rs1190545	14	102904179	G	C	0.7363
rs8022179	14	103847287	T	A	0.7363
rs12101888	15	42231353	C	T	0.2442
rs149698681	15	42651900	G	C	0.0219
rs55707100	15	43820717	C	T	0.026
rs11071720	15	63341996	T	C	0.6991
rs1631677	15	65198591	A	G	0.1428
rs2033784	15	67449660	A	G	0.2964
rs2115536	15	80194247	C	T	0.5663
rs8026803	15	80260014	T	C	0.2612
rs3540	15	91045408	G	A	0.3238
rs7168592	15	101723499	C	T	0.1071
rs2238368	16	170328	C	T	0.4608
rs12598529	16	4120076	G	A	0.6471
rs12935413	16	11210447	G	A	0.3529
rs924135	16	16123459	A	T	0.6139
rs151233	16	28506428	C	T	0.1304
rs12716977	16	30482803	T	C	0.517
rs7192652	16	57075180	A	G	0.4789
rs7672	16	68294800	C	G	0.7139
rs4783186	16	85415734	T	C	0.8769
rs8064111	16	85947475	C	T	0.1294
rs11640143	16	85989464	T	C	0.0776
rs59865663	16	88558312	G	A	0.2041
rs34210653	17	4535314	G	A	0.0214
rs74480102	17	7742601	G	A	0.043
rs4791641	17	8161149	C	T	0.5021
rs3818717	17	17707105	T	C	0.5922
rs225245	17	33946107	A	G	0.4562
rs12453682	17	37770005	C	T	0.6935
rs12600856	17	38163295	T	C	0.3904
rs150568286	17	42594755	G	A	0.0127
rs8069437	17	44906949	T	C	0.7693
rs34097845	17	56358429	C	T	0.058
rs7212590	17	57885709	C	T	0.0797
rs1801689	17	64210580	A	C	0.0302
rs1037171	17	72702978	G	A	0.7232
rs77572283	17	81072094	T	C	0.459
rs11082304	18	20720973	G	T	0.5132
rs16978075	18	42113151	T	C	0.1099
rs8093407	18	43849464	A	G	0.7492
rs78415359	18	46207268	G	A	0.0324
rs1025688	18	48147876	G	A	0.3743
rs17758695	18	60920854	C	T	0.03
rs12458462	18	77472436	C	A	0.3691
rs56757486	19	836144	G	A	0.2525
rs57908212	19	2161321	T	C	0.4747
rs10415135	19	4061544	C	T	0.1907
rs413141	19	6675989	A	G	0.8627
rs55908509	19	16442019	G	A	0.3292
rs11086102	19	18398628	G	C	0.6317
rs2285627	19	19467937	T	C	0.6677
rs12608697	19	38765660	C	A	0.4055
rs12976598	19	39229959	G	A	0.0642
rs4760	19	44153100	A	G	0.1568
rs56344893	19	44282529	C	A	0.3754
rs11083766	19	45715490	T	C	0.3397
rs10418046	19	54327869	T	G	0.2141
rs2853203	20	3626989	G	A	0.3364
rs6084653	20	4157072	C	G	0.3877
rs80054178	20	30294682	T	C	0.0225
rs1555133	20	31048382	G	A	0.3126
rs12480732	20	31191015	C	T	0.2604
rs1800961	20	43042364	C	T	0.0314
rs6125961	20	48884124	C	A	0.2027
rs16979901	20	54988877	A	G	0.1025
rs737092	20	55990405	T	C	0.4891
rs34524896	20	57594684	C	T	0.0475
rs1997595	21	16578159	A	C	0.3406
rs56117721	21	36398586	T	A	0.0726
rs8129030	21	36712588	T	A	0.631
rs9974653	21	40741846	A	C	0.3186
rs2070433	21	47961386	G	A	0.2245	missing asthma mvmr
rs5013026	22	18171650	C	T	0.5045
rs5754100	22	21916166	T	C	0.1941
rs7288670	22	24621826	A	G	0.3075
rs2076085	22	37470041	C	A	0.5364
rs3747207	22	44324855	G	A	0.2141
rs9330813	22	46364161	G	A	0.3157
rs75107793	22	50628937	G	A	0.0725

## Sheet: ST10
Supplementary Table 10 Comparison of multivariable MR results, using standard approach, and method adjusted for weak instruments
			Standard Multivariable MR results			Multivariable MR results, adjusted for weak instruments*, with jack-knifed standard errors**, as per Sanderson et al.			Multivariable MR results, omitting SNPs contributing most to heterogeneity (SNPs detailed in Supplementary Table 11)
Effect	exposure	outcome	mvmr_beta	mvmr_se	mvmr_pval	mvmr_jk_beta	mvmr_jk_se	mvmr_jk_pval	mvmr_het_beta	mvmr_het_se	mvmr_het_pval
logOR	Basophils	ACO	0.019963	0.166365	0.904487	0.150027	0.254186	0.555461	0.0494563	0.139697	0.723572
logOR	Basophils	Asthma	-0.077633	0.175831	0.658837	-0.290429	0.3913	0.458509	-0.0623881	0.152867	0.683482
Beta	Basophils	FEV1	0.00102214	0.0278538	0.970727	-0.014188	0.103843	0.891411	-0.00163173	0.0248419	0.947673
Beta	Basophils	FEV1FVC	-0.00227972	0.0296864	0.938788	-0.0500635	0.180355	0.781514	-0.0242781	0.0268768	0.367096
Beta	Basophils	FEV1FVC (UKB)	-0.00506899	0.0324054	0.875699	-0.0641278	0.160461	0.689685	-0.0265664	0.0294391	0.367568
Beta	Basophils	FEV1FVC (UKB asthma)	-0.0251051	0.054951	0.64777	-0.0338328	0.363788	0.925961	-0.0354608	0.0535689	0.50851
Beta	Basophils	FEV1FVC (UKB no asthma)	-0.00633572	0.0312217	0.839192	-0.0690162	0.0975682	0.479862	-0.029679	0.0292214	0.310624
logOR	Eosinophils	ACO	0.666305	0.111203	2.07561e-09	0.451991	0.195312	0.021296	0.40967	0.103752	9.83072e-05
logOR	Eosinophils	Asthma	1.06527	0.117387	1.13788e-19	0.981881	0.246953	8.69193e-05	0.829413	0.113261	2.32306e-12
Beta	Eosinophils	FEV1	-0.0316985	0.0185185	0.0869489	-0.0152901	0.0604855	0.800595	-0.0178492	0.0184023	0.332867
Beta	Eosinophils	FEV1FVC	-0.0652423	0.0198714	0.00102629	-0.0218715	0.101366	0.829308	-0.0392247	0.0199669	0.0504092
Beta	Eosinophils	FEV1FVC (UKB)	-0.0707627	0.0216563	0.00108487	-0.0177079	0.0758801	0.815627	-0.0408861	0.0218448	0.0622386
Beta	Eosinophils	FEV1FVC (UKB asthma)	-0.0927051	0.0366553	0.0114353	-0.0750025	0.323339	0.816718	-0.051167	0.039759	0.199128
Beta	Eosinophils	FEV1FVC (UKB no asthma)	-0.0282247	0.0208629	0.176097	0.018455	0.0511338	0.718404	-0.010556	0.0216779	0.626656
logOR	Lymphocytes	ACO	-0.121774	0.113383	0.282821	-0.142773	0.192691	0.459276	0.0452558	0.098478	0.646175
logOR	Lymphocytes	Asthma	-0.104722	0.119597	0.381238	-0.0383986	0.283069	0.892184	0.0410414	0.107508	0.70292
Beta	Lymphocytes	FEV1	0.00815864	0.0188914	0.665835	-0.00641918	0.080369	0.93639	-0.00529294	0.0174144	0.761387
Beta	Lymphocytes	FEV1FVC	0.0317894	0.0202596	0.116623	-0.011196	0.135283	0.934095	0.0133009	0.0189648	0.483639
Beta	Lymphocytes	FEV1FVC (UKB)	0.0438725	0.022091	0.0470349	-0.0038128	0.107772	0.9718	0.0216213	0.0207565	0.298417
Beta	Lymphocytes	FEV1FVC (UKB asthma)	0.0810254	0.0373923	0.0302426	-0.0128667	0.295309	0.965275	0.0336858	0.0376762	0.372005
Beta	Lymphocytes	FEV1FVC (UKB no asthma)	0.0319926	0.0212822	0.132772	-0.0206983	0.0739709	0.779801	0.0183657	0.0206059	0.373503
logOR	Monocytes	ACO	-0.114116	0.076241	0.134451	0.0835424	0.123432	0.499006	-0.0518879	0.0625709	0.407622
logOR	Monocytes	Asthma	-0.132997	0.0818	0.103976	-0.0826769	0.115002	0.472724	-0.0758983	0.0695515	0.276052
Beta	Monocytes	FEV1	-0.00147259	0.0127487	0.908042	-0.0155467	0.028238	0.582324	-0.00458687	0.0111102	0.680015
Beta	Monocytes	FEV1FVC	0.0130542	0.0136763	0.339823	0.031904	0.0720203	0.658078	0.00878216	0.0121015	0.468591
Beta	Monocytes	FEV1FVC (UKB)	0.01482	0.0148595	0.318599	0.0303129	0.0581418	0.602479	0.00977929	0.0131956	0.459217
Beta	Monocytes	FEV1FVC (UKB asthma)	0.00568552	0.0250026	0.820115	0.030438	0.123966	0.806202	-0.00367775	0.0238175	0.877389
Beta	Monocytes	FEV1FVC (UKB no asthma)	0.00933816	0.0143262	0.514514	0.0354016	0.0505535	0.484268	0.00793207	0.0131078	0.545549
logOR	Neutrophils	ACO	0.231	0.108434	0.0331441	0.130502	0.180057	0.469121	0.14347	0.0962818	0.13726
logOR	Neutrophils	Asthma	0.0652007	0.11487	0.570303	0.0755791	0.304118	0.803894	0.0136933	0.105623	0.896937
Beta	Neutrophils	FEV1	-0.016015	0.0181112	0.376555	-0.0125067	0.0631128	0.843044	-0.00836689	0.0170588	0.624163
Beta	Neutrophils	FEV1FVC	-0.00239801	0.0192966	0.901101	-0.00530434	0.085776	0.95073	-0.0127111	0.0184992	0.492549
Beta	Neutrophils	FEV1FVC (UKB)	-0.00443366	0.0211144	0.833681	-0.00476327	0.0971474	0.960925	-0.0132008	0.0202759	0.515514
Beta	Neutrophils	FEV1FVC (UKB asthma)	-0.026619	0.0357102	0.45602	-0.0169841	0.224565	0.939761	-0.0352076	0.0368242	0.339804
Beta	Neutrophils	FEV1FVC (UKB no asthma)	0.00869106	0.020351	0.669336	0.00657027	0.0548082	0.904656	-0.0055775	0.0201363	0.781984
logOR	Platelets	ACO	-0.0378085	0.0687294	0.582246	0.00611441	0.11657	0.958201	0.0156627	0.0571061	0.784066
logOR	Platelets	Asthma	-0.0327334	0.0731242	0.654412	-0.0300862	0.153671	0.844906	0.0387687	0.0629487	0.53845
Beta	Platelets	FEV1	0.0189823	0.0114793	0.0982071	0.0308089	0.0323072	0.341	0.0156397	0.0101287	0.123633
Beta	Platelets	FEV1FVC	0.00314139	0.0122572	0.797728	0.0278774	0.0491801	0.571222	0.00744777	0.0109752	0.497924
Beta	Platelets	FEV1FVC (UKB)	0.000336947	0.0133983	0.979936	0.0293471	0.0357898	0.412841	0.00372528	0.0120448	0.757322
Beta	Platelets	FEV1FVC (UKB asthma)	-0.0085528	0.0227061	0.706416	0.000181613	0.136167	0.998937	-0.0131946	0.0218938	0.547194
Beta	Platelets	FEV1FVC (UKB no asthma)	-0.00120814	0.012926	0.925533	0.0324591	0.0421243	0.441547	0.00701501	0.0119727	0.558379
logOR	RBCs	ACO	0.0157978	0.085351	0.853157	-0.0752774	0.148153	0.611733	0.0495427	0.0700985	0.480273
logOR	RBCs	Asthma	-0.0522564	0.0908647	0.565223	-0.0715476	0.174554	0.682167	-0.0167144	0.0773184	0.829
Beta	RBCs	FEV1	-0.0183627	0.0143075	0.199339	-0.00580829	0.0430725	0.892817	-0.0160745	0.0124771	0.198643
Beta	RBCs	FEV1FVC	-0.018672	0.0152217	0.219946	-0.00662574	0.0821976	0.935805	-0.0140945	0.0134747	0.296416
Beta	RBCs	FEV1FVC (UKB)	-0.0189226	0.016636	0.255351	-0.00329328	0.0510417	0.948596	-0.0148797	0.0147833	0.314987
Beta	RBCs	FEV1FVC (UKB asthma)	-0.0339257	0.0281818	0.228661	-0.0150168	0.183825	0.934944	-0.0341563	0.0268651	0.204588
Beta	RBCs	FEV1FVC (UKB no asthma)	-0.0181329	0.016026	0.257859	-0.00385053	0.0546878	0.943912	-0.0112149	0.0146725	0.445273
logOR	Reticulocytes	ACO	-0.0279948	0.0731026	0.701755	-0.0437751	0.121388	0.718623	-0.0194473	0.0609016	0.749707
logOR	Reticulocytes	Asthma	-0.061293	0.0777924	0.430753	-0.0510129	0.166806	0.759942	-0.0457097	0.0671597	0.496651
Beta	Reticulocytes	FEV1	-0.00592169	0.0122105	0.627699	-0.00563536	0.052455	0.914514	-0.00867903	0.0108019	0.422346
Beta	Reticulocytes	FEV1FVC	0.00211429	0.012989	0.870696	-0.0106482	0.0850709	0.900469	0.00830122	0.0116586	0.477012
Beta	Reticulocytes	FEV1FVC (UKB)	0.000731564	0.0142427	0.959035	-0.0152809	0.0519029	0.768635	0.00698921	0.0128388	0.586589
Beta	Reticulocytes	FEV1FVC (UKB asthma)	-0.0222921	0.0241604	0.356179	-0.0292771	0.20253	0.885153	-0.0227828	0.0233599	0.330213
Beta	Reticulocytes	FEV1FVC (UKB no asthma)	-0.000456256	0.013728	0.973487	-0.0153947	0.0450065	0.732536	0.0079039	0.0127497	0.535785
*Using qhet_mvmr() function of R package 'MVMR', which implements a method described in Sanderson,et al.,2019, IJE 48, 3, 713-727. doi: 10.1093/ije/dyy262.
**Standard errors calculated using a jack-knife approach. See Extended Methods.
***FEV1FVC (UKB {asthma | no asthma}) = FEV1/FVC results in UK Biobank (all participants, N=327,047), then stratified by asthma case status (37868 with asthma vs. 283179 without).

[truncated: 1 more sheets: ST11]
